# Supplementary material for: Hope for the Best, Prepare for the Worst—An Assessment of Flood Preparedness at Primary Health Care Facilities in Central Vietnam
Source: MDPI journal article supplement (doi:10.3390/ijerph15122689), 2018-11-29
Supplement: s1 [file s1]

| FLOOD PREPAREDNESS ASSESSMENT FORM                                                                                              |
|---------------------------------------------------------------------------------------------------------------------------------|
| <p align="center"><b>Factors influencing level of primary health care flood preparedness<br/>in THUA THIEN HUE PROVINCE</b></p> |

Date:

Name of CHC:

Head of CHC:

Address:

Phone number:

**A. General information**

| <b>1. Geographical data</b>                                                                           | <i>Item</i>                                        | <i>Comment</i>                                                                                                                      |
|-------------------------------------------------------------------------------------------------------|----------------------------------------------------|-------------------------------------------------------------------------------------------------------------------------------------|
| a. Straight line distance to the coast (km)                                                           |                                                    |                                                                                                                                     |
| b. Straight line distance to nearest main river or lagoon (km)                                        |                                                    |                                                                                                                                     |
| c. Height above sea level (ground floor) (m)                                                          |                                                    |                                                                                                                                     |
| <b>2. Coverage area</b>                                                                               | <i>Item</i>                                        | <i>Comment</i>                                                                                                                      |
| a. Number of villages                                                                                 |                                                    |                                                                                                                                     |
| b. Number of population                                                                               |                                                    |                                                                                                                                     |
| c. Average number of patients seen per month (doctor/midwife/nurse, all visit types, incl. follow-up) |                                                    |                                                                                                                                     |
| <b>3. Climate history</b>                                                                             | <i>CHC or covered area affected by flood (y/n)</i> | <i>No. of affected villages</i><br><i>No. of affected people, e.g. damaged house or health effect</i><br><i>No. of flood deaths</i> |
| 2007                                                                                                  |                                                    |                                                                                                                                     |
| 2008                                                                                                  |                                                    |                                                                                                                                     |
| 2009                                                                                                  |                                                    |                                                                                                                                     |
| 2010                                                                                                  |                                                    |                                                                                                                                     |
| 2011                                                                                                  |                                                    |                                                                                                                                     |
| 2012                                                                                                  |                                                    |                                                                                                                                     |
| 2013                                                                                                  |                                                    |                                                                                                                                     |

**B: Key informant interview**

| <b>4. Human resources</b>                     | <i>Number</i>                | <i>I. Trained in flood preparedness</i> | <i>II. Trained in basic life support, incl. rescue breaths &amp; chest compression.</i> | <i>III. Trained in advanced life support, incl. tracheal intubation &amp; cardiac defibrillation</i> | <i>IV. Trained in emergency &amp; trauma care</i> | <i>V. Trained in endemic disease management</i> |
|-----------------------------------------------|------------------------------|-----------------------------------------|-----------------------------------------------------------------------------------------|------------------------------------------------------------------------------------------------------|---------------------------------------------------|-------------------------------------------------|
| a. Doctors                                    |                              |                                         |                                                                                         |                                                                                                      |                                                   |                                                 |
| b. Assistant doctors                          |                              |                                         |                                                                                         |                                                                                                      |                                                   |                                                 |
| c. Midwives                                   |                              |                                         |                                                                                         |                                                                                                      |                                                   |                                                 |
| d. Nurses                                     |                              |                                         |                                                                                         |                                                                                                      |                                                   |                                                 |
| e. Pharmacist                                 |                              |                                         |                                                                                         |                                                                                                      |                                                   |                                                 |
| f. Staff supervision (y/n)                    |                              |                                         |                                                                                         |                                                                                                      |                                                   |                                                 |
| <b>5. Planning</b>                            | <i>Available/Unavailable</i> | <i>Comment</i>                          |                                                                                         |                                                                                                      |                                                   |                                                 |
| a. CHC flood plan (i.e. routines, guidelines) |                              |                                         |                                                                                         |                                                                                                      |                                                   |                                                 |

**C. General information**

| <b>6. Training, planning, funding &amp; health effects</b>                                               | <i>Comment</i> |
|----------------------------------------------------------------------------------------------------------|----------------|
| a. What routine trainings are given by government or NGOs (I-V listed in question 4 or other trainings)? |                |
| b. Is there any separate funding for flood preparedness annually? Any funding in case of flood?          |                |
| c. Is current training and funding sufficient?                                                           |                |
| d. How and when are routines and guidelines received (e.g. yearly by fax)?                               |                |
| e. What support is given in case of flood? By whom?                                                      |                |

|                                                                                                                                              |  |
|----------------------------------------------------------------------------------------------------------------------------------------------|--|
| f. Is current situation regarding guidelines and support sufficient?                                                                         |  |
| g. Is the CHC doing any community work to raise awareness regarding flood preparedness (e.g. disease prevention, ensure safe water quality)? |  |
| h. What are the general health effects seen at the CHC following floods?                                                                     |  |
| i. What is the average change in patients seen after a flood (%)?                                                                            |  |

#### D. Key informant interview

| 7. Coordination                | Available/Unavailable | Comment |
|--------------------------------|-----------------------|---------|
| a. Other CHCs                  |                       |         |
| b. District/city health centre |                       |         |
| c. Provincial/central hospital |                       |         |
| 8. Additional information      |                       |         |
|                                |                       |         |

#### E: Direct observations

| 9. Facilities                                           | Available/Unavailable | Comment |
|---------------------------------------------------------|-----------------------|---------|
| a. flood safe construction (e.g. buildings on stilts)   |                       |         |
| b. Water supply                                         |                       |         |
| c. Electricity supply                                   |                       |         |
| d. Toilets                                              |                       |         |
| e. Outpatient facilities with roof while waiting        |                       |         |
| f. Outpatient facilities with roof while receiving care |                       |         |
| g. In ward facilities                                   |                       |         |
| h. Delivery room                                        |                       |         |
| i. Pharmacy                                             |                       |         |

|                                                                                                     |                              |                |
|-----------------------------------------------------------------------------------------------------|------------------------------|----------------|
| j. Medical record                                                                                   |                              |                |
| k. Emergency food stockpile for staff members                                                       |                              |                |
| l. Emergency water stockpile for staff members                                                      |                              |                |
| m. Car available for rescue and relief                                                              |                              |                |
| n. Generator set                                                                                    |                              |                |
| o. Communication system, i.e. e-mail or phone or fax                                                |                              |                |
| <b>10. Equipment</b>                                                                                | <i>Available/Unavailable</i> | <i>Comment</i> |
| a. Basic steam autoclave for sterilization                                                          |                              |                |
| <b>11. Supplies</b>                                                                                 | <i>Available/Unavailable</i> | <i>Comment</i> |
| <i>Initial wound care</i>                                                                           |                              |                |
| a. Solution for wound cleansing, e.g. potable water or normal saline                                |                              |                |
| b. Simple dressing material                                                                         |                              |                |
| <i>Basic fracture management</i>                                                                    |                              |                |
| c. Basic splints                                                                                    |                              |                |
| d. Plaster of Paris (POP)                                                                           |                              |                |
| <i>Laboratory</i>                                                                                   |                              |                |
| e. Glucose                                                                                          |                              |                |
| f. Haemocue or similar                                                                              |                              |                |
| g. Rapid detection for malaria or microscopy                                                        |                              |                |
| h. Urine analysis to estimate the presence of sugar, red cells and white cells, e.g. urine dipstick |                              |                |
| <i>Drug supply</i>                                                                                  |                              |                |
| i. Oral analgesia                                                                                   |                              |                |
| j. Parenteral analgesia                                                                             |                              |                |
| k. Local analgesia                                                                                  |                              |                |
| l. Antibiotics for respiratory tract infections                                                     |                              |                |
| m. Antibiotics for diarrhoeal disease                                                               |                              |                |

|                                   |  |  |
|-----------------------------------|--|--|
| n. Tetanus prophylaxis            |  |  |
| o. Malaria treatment              |  |  |
| p. Treatment for hypertension     |  |  |
| q. Treatment for asthma           |  |  |
| r. Insulin                        |  |  |
| s. Diazepam                       |  |  |
| <b>12. Additional information</b> |  |  |
|                                   |  |  |
